# Supplementary material
Source: HighWire-hosted journal article supplement (https://bmjopen.bmj.com/content/7/6/e014885)
Supplement: inline-supplementary-material-1 [file inline-supplementary-material-1.docx]

**APPENDIX A**

# A short practical guide for identifying suspicion of sepsis (SOS) using Hospital Episode Statistics. The guide includes the full list of SOS codes.

**Introduction**

The lack of suitable outcome measures for sepsis have hampered evaluation of local and national campaigns and improvement programs (Rhee et al., 2014). In a recent paper we developed a methodology for identifying patients with ‘suspicion of sepsis’ who are the critical target group both for clinical intervention and for sepsis detection and improvement programmes. The accompanying paper in BMJ Open (Inada Kim et al., 2017) describes our approach and findings but contains only a limited account of the coding and analysis. This brief guide complements the paper and provides a full description of our coding strategy to allow others to identify suspicion of sepsis patients in their own organisation or region.

**The problem with simply using sepsis codes**

Sepsis is coded in Hospital Episode Statistics (HES) data with codes starting with A40/41. While this is important information we need to adopt a broader perspective to fully explore the impact of sepsis improvement programmes. The main reasons for this are:

1. Most sepsis campaigns and improvement programs do not target the treatment of fully developed sepsis but instead are aimed at the rapid detection and treatment of patients with suspicion of sepsis. Clinicians do not treat sepsis per se, they treat proactively for sepsis when there are signs of infection. The concept of assessing and treating patients with suspected sepsis is central to the 2016 NICE guidelines. The target population is therefore suspicion of sepsis, not sepsis.

2. Specific sepsis codes (A40/A41) currently severely underestimate the true incidence of sepsis (NCEPOD, 2015). Clinicians and coders in the UK typically document the source of infections (e.g. pneumonia, urinary tract infection) rather than documenting sepsis (NCEPOD, 2015). New UK guidelines for the coding of sepsis were introduced in April 2017 requiring both sepsis and its source to be coded; as a result, rapid increases in A40/A41 are expected to occur nationally. Caution is needed in interpreting trends in mortality for specific sepsis codes: it may be unclear to what extent falls in mortality for specific sepsis codes are due to actual improvements in care or a diluting effect of increased coding of patients who are less sick than those who would previously have been included.

**Defining and identifying patients with ‘suspicion of sepsis’**

The group, “suspicion of sepsis”, consists of patients who have a bacterial infection serious enough to require hospital admission. A list of 200 clinically validated ICD- 10 codes that relate to bacterial infection have been developed to allow the identification of patients with suspicion of sepsis from local administrative data (Hospital Episode Statistics or Local Hospital Operational Data). The outcomes of these patients (e.g. mortality, length of stay, readmission rate, intensive care admissions) can be tracked over time to assess the impact of treatments and improvement programmes.

**How to extract suspicion of sepsis data**

The following fields are required from Hospital Episode Statistics data (or hospital operational data available from local hospital informatics teams):

| Field Name |
| --- |
| Admission Month |
| Admission Year |
| Discharge Method |
| IPAdmissionMethodValue |
| ProviderCode |
| CCG Code of Responsibility |
| Primary Diagnosis |
| Age on Admission |
| Gender |
| Length of Stay (Spell Duration) |
| Discharge Destination |
| Death Month |
| Death Year |
| Did they Attend Critical Care? |

The query must be filtered using the following WHERE clauses:

- Only Finished Consultant Episodes to be included
- We will be interested in looking at the admission episode only so Episode Order = 1. All fields can be taken from episode 1, except the following which must be based on the final episode of the spell:

| Length of Stay (Spell Duration) |
| --- |
| Discharge Destination |
| Death Month |
| Death Year |

**“Suspicion of sepsis” coding set: ICD-10 bacterial infection codes**

Filter the primary diagnosis of the first episode by the following by 4 digit ICD-10 codes given below.

**I. Certain Infectious and parasitic diseases**

1. A01 Typhoid and paratyphoid fevers (incl. A01.0, A01.1, A01.2, A01.3, A01.4)
2. A02 Other salmonella infections (incl. A02.0, A02.1, A02.2, A02.8, A02.9)
3. A03 Shigellosis (incl. A03.0, A03.1, A03.2, A03.3, A03.8, A03.9)
4. A04 Other bacterial intestinal infections (incl. A04.0, A04.1, A04.2, A04.3, A04.4, A04.5, A04.6, A04.7, A04.8, A04.9)
5. A06 Amoebiasis (incl. A06.0, A06.1, A06.2, A06.3, A06.4, A06.5, A06.6, A06.7, A06.8, A06.9)
6. A15 Respiratory tuberculosis (incl. A15.0, A15.2, A15.3, A15.4, A15.5, A15.6, A15.7, A15.8, A15.9)
7. A16 Respiratory tuberculosis, not confirmed bacteriologically or histologically (incl. A16.0, A16.1, A16.2, A16.3, A16.4, A16.5, A16.7, A16.8, A16.9)
8. A17 Tuberculosis of nervous system (incl. A17.0, A17.1, A17.8, A17.9)
9. A18 Tuberculosis of other organs (incl. A18.0, A18.1, A18.2, A18.3, A18.4, A18.5, A18.6, A18.7, A18.8)
10. A19 Miliary tuberculosis (incl. A19.0, A19.1, A19.2, A19.8, A19.9)
11. A27 Leptospirosis (incl. A27.0, A27.8, A27.9)
12. A32 Listerosis (incl. A32.0, A32.1, A32.7, A32.8, A32.9)
13. A37 Whopping cough (all subcategories)
14. A38 Scarlet fever
15. A39 Meningococcal infection (incl. A39.0, A39.1, A39.2, A39.4, A39.5, A39.8, A39.9)
16. A40 Streptococcal sepsis (incl. A40.0, A40.1, A40.2, A40.3, A40.8, A40.9)
17. A41 Other Sepsis (incl. A41.0, A41.1, A41.2, A41.3, A41.4, A41.5, A41.8, A41.9)
18. A42 Actinomycosis (all subcategories)
19. A43 Nocardiosis (all subcategories)
20. A44 Bartenollosis (all subcategories)
21. A46 Erysipelas
22. A48 Other Bacterial diseases, not elsewhere classified (incl. A48.0, A48.1, A48.2, A48.3, A48.4, A48.8)
23. A49 Bacterial infection of unspecified site (incl. A49.0, A49.1, A49.2, A49.3, A49.8, A49.9)
24. A51 Early syphilis (all subcategories)
25. A54 Gonococcal infection (incl. A54.1, A54.2, A54.3, A54.4, A54.5, A54.6, A54.8, A54.9)
26. A55 Chlamydial lymhogranuloma (venereum)
27. A56 Other sexually transmitted chlamydial diseases (incl. A56.0, A56.1, A56.2, A56.3, A56.4, A56.8)
28. A68 Relapsing fevers (all subcategories)
29. A69.2 Lyme disease
30. A70 Chlamydia psittaci infection
31. A75 Typhus fever (all subcategories)
32. A77 Spotted fever (all subcategories)
33. A78 Q fever
34. A79 Other rickettsioses (all subcategories)
35. B59 Pneumocystosis

**VI. Diseases of the nervous system**

1. G00 Bacterial meningitis, not elsewhere classified (incl. G00.0, G00.1, G00.2, G00.3, G00.8, G00.9)
2. G01 Meningitis in bacterial diseases classified elsewhere
3. G04.2 Bacterial meningoencephalitis and meningomyelitis, not elsewhere classified
4. G06 Intracranial and intraspinal abscess and granuloma (incl. G06.0, G06.1, G06.2)

**VIII. Diseases of the ear and mastoid process**

1. H60 Otitis externa (incl. H60.0, H60.1, H60.2, H60.3)
2. H66 Suppurative and unspecified otitis media (incl. H66.0, H66.4, H66.9)
3. H67.0 Otitis media in bacterial diseases classified elsewhere
4. H68.0 Eustachian salpingitis
5. H70 Mastoiditis and related conditions (incl. H70.0, H70.9)
6. H73.0 Acute myringitis

**IX. Diseases of the circulatory system**

1. I00 Rheumatic fever without mention of heart involvement
2. I01 Rheumatic fever with heart involvement (incl. I01.0, I01.1, I01.2, I01.8, I01.9)
3. I02 Rheumatic chorea (incl. I02.0, I02.9)
4. I33 Acute and subacute endocarditis (incl. I33.0, I33.9)
5. I38 Endocarditis, valve unspecified

**X. Diseases of the respiratory system**

1. J01 Acute sinusitis (incl. J01.0, J01.1, J01.2, J01.3, J01.4, J01.8, J01.9)
2. J02 Acute pharyngitis (incl. J02.0, J02.9)
3. J03 Acute tonsillitis (incl. J03.0, J03.9)
4. J05.1 Acute epiglottitis
5. J06.9 Acute upper respiratory infection, unspecified
6. J13 Pneumonia due to Streptococcus pneumoniae,
7. J14 Pneumonia due to Haemophilus influenza,
8. J15 Bacterial pneumonia, not elsewhere classified (J15.0, J15.1, J15.2, J15.3, J15.4, J15.5, J15.6, J15.7, J15.8, J15.9)
9. J16 Pneumonia due to other infectious organisms, not elsewhere classified (incl. J16.0, J16.8)]
10. J17.0 Pneumonia in bacterial diseases classified elsewhere (incl. J17.0, J17.8)
11. J18 Pneumonia, organism unspecified (including J18.0, J18.1, J18.2, J18.8 and J18.9)
12. J20 Acute bronchitis (incl. J20.0, J20.1, J20.2, J20.8, J20.9)
13. J22 Unspecified acute lower respiratory infection
14. J36 Peritonsillar abscess
15. J39 Other diseases of upper respiratory tract (incl. J39.0, J39.1)
16. J44.0 Chronic obstructive pulmonary disease with acute lower respiratory infection
17. J69 Pneumonitis due to solids and liquids (incl. J69.0, J69.8)
18. J84.9 Interstitial pulmonary disease unspecified (interstitial pneumonia NOS)
19. J85 Abscess of lung and mediastinum (incl. J85.1, J85.2, J85.3)
20. J86 Pyothorax (incl. J86.0, J86.9)
21. J95.0 Sepsis of tracheostomy stoma
22. J98.5 Diseases of mediastinum, not elsewhere classified- Mediastinitis

**XI. Diseases of the digestives system (dental disorders omitted)**

1. K22.3 Perforation of oesophagus
2. K35 Acute appendicitis (incl. K35.2, K35.3, K35.8)
3. K37 Unspecified appendicitis
4. K57 Diverticular disease of intestine (incl. K57.0, K57.2, , K57.4, K57.8,)
5. K61 Abscess of anal and rectal regions (incl. K61.0, K61.1, K61.2, K61.3, 61.4)
6. K63.0 Abscess of intestine
7. K63.1 Perforation of intestine (nontraumatic)
8. K65.0 Acute peritonitis (incl. K65.0, K65.8, K65.9)
9. K67 Disorders of peritoneum in infectious diseases classified elsewhere (all subcategories)
10. K75.0 Abscess of liver
11. K80.0 Calculus of gallbladder with acute cholecystitis/cholangitis (incl.K80.0, K80.1, K80.3, K80.4)
12. K81 Cholecystitis (incl. K81.0, K81.1, K81.8, K81.9)
13. K82.2 Perforation of gallbladder
14. K83.0 Cholangitis
15. K83.2 Perforation of bile duct

**XII. Diseases of skin and subcutaneous tissue**

1. L00 Staphylococcal scalded skin syndrome
2. L01 Impetigo (L01.0, L01.1)
3. L02 Cutaneous abscess, furuncle and carbuncle (incl. L02.0, L02.1, L02.2, L02.3, L02.4, L02.8, L02.9)
4. L03 Cellulitis (including L03.0, L03.1, L03.2, L03.3, L03.8 and L03.9)
5. L05.0 Pilonidal cyst with abscess
6. L08 Other local infections of skin and subcutaneous tissue (incl. L08.0, L08.8, L08.9)
7. L30.3 Infective dermatitis
8. L53.3 Erythema marginatum
9. L98.0 Pyogenic granuloma

**XIII. Diseases of the musculoskeletal system and connective tissue**

1. M00 Pyogenic arthritis (incl. M00.0, M00.1, M00.2, M00.8, M00.9)
2. M01 Direct infections of joint in infectious and parasitic diseases classified elsewhere (incl. M01.0, M01.1, M01.2, M01.3)
3. M46.2 Osteomyelitis of vertebra
4. M46.4 Discitis, unspecified
5. M65 Synovitis and tenosynovitis (incl. M65.0, M65.1)
6. M71.0 Abscess of bursa
7. M72.6 Necrotizing fasciitis
8. M86 Osteomyelitis

**XIV. Diseases of genitourinary system**

1. N10 Acute tubulo-interstitial nephritis
2. N11 Chronic tubulo-interstitial nephritis (incl. N11.0, N11.1, N11.8, N11.9)
3. N12 Tubulo-intestitial nephritis, not specified as acute or chronic
4. N13.6 Pyonephrosis
5. N15.1 Renal and perinephric abscess
6. N15.9 Renal tubulo-interstitial disease, unspecified
7. N30 Cystitis, unspecified (including N30.0, N30.8, N30.9)
8. N34.0 Urethral abscess
9. N39.0 Urinary tract infection, site not specified
10. N41.0 Acute prostatitis
11. N43.1 Infected hydrocele
12. N45 Orchitis and epididymitis (incl. N45.0, N45.9)
13. N48.2 Other disorders of penis (incl. N48.1, N48.2)
14. N49.9 Inflammatory disorder of unspecified male genital organ
15. N61 Inflammatory disorders of breast
16. N70 Salpingitis and oophoritis (incl N70.0, N70.9)
17. N71 Inflammatory disease of uterus, except cervix (incl. N71.0, N71.9)
18. N73 Other female pelvic inflammatory diseases (incl. N73.0, N73.1, N73.2, N73.4, N73.9)
19. N75.1 Abscess of Bartholin gland
20. N76 Other inflammation of vagina and vulva (incl. N76.0, N76.1, N76.3, N76.4, N76.8)

**XV. Pregnancy, Childbirth and the puerperium**

1. O08.0 Genital tract and pelvic infection following abortion and ectopic and molar pregnancy
2. O23 Infections of genitourinary tract in pregnancy (incl. O23.0, O23.1, O23.2, O23.3, O23.4, O23.5, O23.9)
3. O41.1 Infection of amniotic sac and membranes
4. O85 Puerperal sepsis
5. O86 Other puerperal infections (incl. O86.0, O86.1, O86.2, O86.3, O86.4, O86.8)
6. O88.3 Obstetric pyaemic and septic embolism
7. O91 Infections of breast associated with childbirth (incl. O91.0, O91.1)

**XVI. Certain conditions originating in the perinatal period**

1. P36 Bacterial sepsis of newborn (incl. P36.0, P36.1, P36.2, P36.3, P36.4, P36.5, P36.8, P36.9)
2. P39 Other infections specific to the perinatal period (incl. P39.0, P39.2, P39.3, P39.4, P39.8, P39.9)
3. P78 Other perinatal digestives system disorders (P78.0, P78.1,)
4. T814 Infection following a procedure, not elsewhere classified
5. T845 Infection and inflammatory reaction due to internal joint prosthesis

**XVIII. Symptoms, signs and abnormal clinical and laboratory findings, not elsewhere classified**

1. R57.2 Septic shock
2. R65 Systemic Inflammatory Response syndrome (incl. R65.0, R65.1, R65.9)

**References**

Inada-Kim M, Page B, Maqsood I, Vincent C. Defining and measuring suspicion of sepsis. *BMJ Open*, 2017.

NCEPOD. Just Say Sepsis! A review of the process of care received by patients with sepsis. 2015. <http://www.ncepod.org.uk/2015report2/downloads/JustSaySepsis_FullReport.pdf>

Rhee C, Gohil S, Klompas M. Regulatory Mandates for Sepsis Care — Reasons for Caution. *New Engl J Med* 2014;370(18):1673-76.

**APPENDIX B**

**Full table of “suspicion of sepsis” diagnoses: number of admissions, deaths, mortality, length of stay and readmission rate**

| **Diagnosis** | **No. of admissions** | **No. of deaths** | **Mortality (%)** | **LOS** | **Readmissions (%)** |
| --- | --- | --- | --- | --- | --- |
| 1. N39.0 - Urinary tract infection, site not specified | 7088 | 285 | 4.0 | 9.0 | 6.4 |
| 1. J18.1 - Lobar pneumonia, unspecified | 5265 | 990 | 18.8 | 9.8 | 6.3 |
| 1. J22.X - Unspecified acute lower respiratory infection | 3808 | 167 | 4.4 | 6.5 | 7.4 |
| 1. J18.9 - Pneumonia, unspecified | 3126 | 483 | 15.5 | 9.6 | 7.1 |
| 1. L03.1 - Cellulitis of other parts of limb | 2983 | 62 | 2.1 | 6.9 | 7.5 |
| 1. J44.0 - Chronic obstructive pulmonary disease with acute lower respiratory infection | 2854 | 184 | 6.4 | 7.2 | 11.3 |
| 1. A41.9 - Sepsis, unspecified | 1882 | 280 | 14.9 | 9.2 | 10.7 |
| 1. T81.4 - Infection following a procedure, not elsewhere classified | 1067 | 3 | 0.3 | 5.9 | 7.7 |
| 1. J03.9 - Acute tonsillitis, unspecified | 1055 | 0 | 0.0 | 1.2 | 5.7 |
| 1. K35.8 - Acute appendicitis, other and unspecified | 993 | 0 | 0.0 | 2.9 | 6.4 |
| 1. N12.X - Tubulo-interstitial nephritis, not specified as acute or chronic | 809 | 1 | 0.1 | 3.5 | 3.5 |
| 1. K61.0 - Anal abscess | 781 | 0 | 0.0 | 1.2 | 5.6 |
| 1. J69.0 - Pneumonitis due to food and vomit | 776 | 260 | 33.5 | 14.1 | 5.0 |
| 1. L02.4 - Cutaneous abscess, furuncle and carbuncle of limb | 710 | 0 | 0.0 | 2.5 | 5.6 |
| 1. L05.0 - Pilonidal cyst with abscess | 533 | 0 | 0.0 | 0.6 | 4.9 |
| 1. L02.2 - Cutaneous abscess, furuncle and carbuncle of trunk | 527 | 1 | 0.2 | 2.5 | 8.2 |
| 1. O23.4 - Unspecified infection of urinary tract in pregnancy | 518 | 0 | 0.0 | 1.3 | 1.0 |
| 1. K80.0 - Calculus of gallbladder with acute cholecystitis | 517 | 6 | 1.2 | 4.7 | 8.5 |
| 1. K37.X - Unspecified appendicitis | 505 | 1 | 0.2 | 2.5 | 3.8 |
| 1. J18.0 - Bronchopneumonia, unspecified | 432 | 242 | 56.0 | 10.5 | 5.8 |
| 1. J36.X - Peritonsillar abscess | 429 | 0 | 0.0 | 1.3 | 2.8 |
| 1. N45.9 - Orchitis, epididymitis and epididymo-orchitis without abscess | 413 | 0 | 0.0 | 1.8 | 6.1 |
| 1. A41.5 - Sepsis due to other Gram-negative organisms | 360 | 40 | 11.1 | 11.5 | 10.8 |
| 1. T84.5 - Infection and inflammatory reaction due to internal joint prosthesis | 345 | 4 | 1.2 | 19.1 | 5.5 |
| 1. K81.9 - Cholecystitis, unspecified | 339 | 5 | 1.5 | 4.0 | 8.8 |
| 1. K35.3 - Acute appendicitis with localized peritonitis | 318 | 2 | 0.6 | 5.2 | 6.6 |
| 1. K81.0 - Acute cholecystitis | 312 | 7 | 2.2 | 6.0 | 8.3 |
| 1. M86.9 - Osteomyelitis, unspecified | 310 | 7 | 2.3 | 14.8 | 9.4 |
| 1. N30.9 - Cystitis, unspecified | 291 | 0 | 0.0 | 0.6 | 1.0 |
| 1. L03.0 - Cellulitis of finger and toe | 289 | 1 | 0.3 | 3.0 | 4.2 |
| 1. K83.0 - Cholangitis | 240 | 18 | 7.5 | 9.5 | 4.6 |
| 1. K81.1 - Chronic cholecystitis | 237 | 0 | 0.0 | 1.7 | 5.9 |
| 1. K57.2 - Diverticular disease of large intestine with perforation and abscess | 231 | 20 | 8.7 | 12.5 | 8.7 |
| 1. N61.X - Inflammatory disorders of breast | 231 | 0 | 0.0 | 1.1 | 7.8 |
| 1. A04.7 - Enterocolitis due to Clostridium difficile | 208 | 20 | 9.6 | 16.1 | 11.1 |
| 1. O86.0 - Infection of obstetric surgical wound | 202 | 0 | 0.0 | 2.0 | 0.0 |
| 1. J06.9 - Acute upper respiratory infection, unspecified | 190 | 1 | 0.5 | 1.1 | 7.9 |
| 1. L02.3 - Cutaneous abscess, furuncle and carbuncle of buttock | 189 | 0 | 0.0 | 1.3 | 8.5 |
| 1. N73.9 - Female pelvic inflammatory disease, unspecified | 180 | 0 | 0.0 | 2.9 | 7.8 |
| 1. J02.9 - Acute pharyngitis, unspecified | 169 | 0 | 0.0 | 0.9 | 7.7 |
| 1. L08.9 - Local infection of skin and subcutaneous tissue, unspecified | 165 | 1 | 0.6 | 3.8 | 4.8 |
| 1. N75.1 - Abscess of Bartholin's gland | 159 | 0 | 0.0 | 0.8 | 2.5 |
| 1. M00.9 - Pyogenic arthritis, unspecified | 140 | 5 | 3.6 | 11.9 | 6.4 |
| 1. A04.5 - Campylobacter enteritis | 136 | 3 | 2.2 | 6.6 | 2.2 |
| 1. K80.3 - Calculus of bile duct with cholangitis | 136 | 7 | 5.1 | 10.6 | 2.9 |
| 1. K63.1 - Perforation of intestine (nontraumatic) | 136 | 51 | 37.5 | 13.0 | 5.9 |
| 1. L03.3 - Cellulitis of trunk | 127 | 0 | 0.0 | 5.2 | 7.1 |
| 1. L03.2 - Cellulitis of face | 124 | 0 | 0.0 | 3.2 | 1.6 |
| 1. K80.4 - Calculus of bile duct with cholecystitis | 117 | 2 | 1.7 | 6.8 | 9.4 |
| 1. J86.9 - Pyothorax without fistula | 114 | 7 | 6.1 | 13.0 | 8.8 |
| 1. H66.9 - Otitis media, unspecified | 113 | 0 | 0.0 | 1.6 | 0.9 |
| 1. J13.X - Pneumonia due to Streptococcus pneumoniae | 112 | 11 | 9.8 | 11.0 | 2.7 |
| 1. N30.8 - Other cystitis | 109 | 0 | 0.0 | 0.9 | 0.9 |
| 1. N10.X - Acute tubulo-interstitial nephritis | 108 | 1 | 0.9 | 4.0 | 4.6 |
| 1. O85.X - Puerperal sepsis | 107 | 0 | 0.0 | 2.8 | 1.9 |
| 1. M86.6 - Other chronic osteomyelitis | 103 | 0 | 0.0 | 12.7 | 4.9 |
| 1. K65.0 - Acute peritonitis | 96 | 13 | 13.5 | 12.6 | 14.6 |
| 1. N13.6 - Pyonephrosis | 93 | 6 | 6.5 | 14.8 | 5.4 |
| 1. I33.0 - Acute and subacute infective endocarditis | 89 | 11 | 12.4 | 21.3 | 9.0 |
| 1. A41.8 - Other specified sepsis | 87 | 32 | 36.8 | 10.5 | 9.2 |
| 1. A04.8 - Other specified bacterial intestinal infections | 82 | 1 | 1.2 | 1.2 | 2.4 |
| 1. J84.9 - Interstitial pulmonary disease, unspecified | 80 | 9 | 11.3 | 5.2 | 3.8 |
| 1. L98.0 - Pyogenic granuloma | 80 | 0 | 0.0 | 0.1 | 3.8 |
| 1. K61.3 - Ischiorectal abscess | 80 | 0 | 0.0 | 3.4 | 10.0 |
| 1. N76.4 - Abscess of vulva | 73 | 0 | 0.0 | 1.4 | 4.1 |
| 1. A41.0 - Sepsis due to Staphylococcus aureus | 70 | 24 | 34.3 | 17.7 | 1.4 |
| 1. O23.0 - Infections of kidney in pregnancy | 66 | 0 | 0.0 | 2.9 | 0.0 |
| 1. M46.4 - Discitis, unspecified | 65 | 1 | 1.5 | 17.9 | 4.6 |
| 1. M86.4 - Chronic osteomyelitis with draining sinus | 65 | 0 | 0.0 | 15.4 | 1.5 |
| 1. O86.4 - Pyrexia of unknown origin following delivery | 61 | 0 | 0.0 | 2.5 | 0.0 |
| 1. L02.1 - Cutaneous abscess, furuncle and carbuncle of neck | 60 | 0 | 0.0 | 3.1 | 1.7 |
| 1. O23.5 - Infections of the genital tract in pregnancy | 59 | 0 | 0.0 | 0.7 | 0.0 |
| 1. N71.9 - Inflammatory disease of uterus, unspecified | 57 | 1 | 1.8 | 2.5 | 1.8 |
| 1. J20.9 - Acute bronchitis, unspecified | 52 | 0 | 0.0 | 2.7 | 1.9 |
| 1. K65.9 - Peritonitis, unspecified | 52 | 18 | 34.6 | 6.2 | 1.9 |
| 1. J15.1 - Pneumonia due to Pseudomonas | 51 | 14 | 27.5 | 17.9 | 7.8 |
| 1. N70.9 - Salpingitis and oophoritis, unspecified | 48 | 0 | 0.0 | 5.3 | 0.0 |
| 1. K75.0 - Abscess of liver | 46 | 2 | 4.3 | 13.6 | 6.5 |
| 1. N41.0 - Acute prostatitis | 45 | 0 | 0.0 | 0.8 | 0.0 |
| 1. M65.1 - Other infective (teno)synovitis | 44 | 0 | 0.0 | 7.0 | 4.5 |
| 1. A49.8 - Other bacterial infections of unspecified site | 44 | 4 | 9.1 | 11.6 | 13.6 |
| 1. L03.9 - Cellulitis, unspecified | 44 | 3 | 6.8 | 6.1 | 11.4 |
| 1. O41.1 - Infection of amniotic sac and membranes | 42 | 0 | 0.0 | 6.2 | 0.0 |
| 1. M00.0 - Staphylococcal arthritis and polyarthritis | 41 | 1 | 2.4 | 14.8 | 2.4 |
| 1. A41.1 - Sepsis due to other specified staphylococcus | 40 | 9 | 22.5 | 11.1 | 12.5 |
| 1. K57.1 - Diverticular disease of small intestine without perforation or abscess | 39 | 0 | 0.0 | 1.4 | 2.6 |
| 1. N11.9 - Chronic tubulo-interstitial nephritis, unspecified | 38 | 0 | 0.0 | 3.9 | 2.6 |
| 1. O86.2 - Urinary tract infection following delivery | 38 | 0 | 0.0 | 1.6 | 0.0 |
| 1. M72.6 - Necrotizing fasciitis | 38 | 11 | 28.9 | 20.4 | 2.6 |
| 1. N48.1 - Balanoposthitis | 38 | 0 | 0.0 | 0.3 | 2.6 |
| 1. J01.9 - Acute sinusitis, unspecified | 37 | 0 | 0.0 | 1.0 | 2.7 |
| 1. M86.8 - Other osteomyelitis | 35 | 0 | 0.0 | 1.5 | 2.9 |
| 1. H60.1 - Cellulitis of external ear | 35 | 0 | 0.0 | 2.4 | 0.0 |
| 1. A49.0 - Staphylococcal infection, unspecified site | 34 | 5 | 14.7 | 14.5 | 8.8 |
| 1. A40.8 - Other streptococcal sepsis | 34 | 6 | 17.6 | 16.1 | 5.9 |
| 1. L02.0 - Cutaneous abscess, furuncle and carbuncle of face | 34 | 0 | 0.0 | 1.9 | 0.0 |
| 1. J05.1 - Acute epiglottitis | 32 | 1 | 3.1 | 3.4 | 3.1 |
| 1. J14.X - Pneumonia due to Haemophilus influenzae | 32 | 3 | 9.4 | 9.1 | 3.1 |
| 1. N48.2 - Other inflammatory disorders of penis | 30 | 0 | 0.0 | 2.4 | 3.3 |
| 1. N45.0 - Orchitis, epididymitis and epididymo-orchitis with abscess | 29 | 0 | 0.0 | 4.4 | 0.0 |
| 1. O91.1 - Abscess of breast associated with childbirth | 29 | 0 | 0.0 | 2.0 | 17.2 |
| 1. M86.1 - Other acute osteomyelitis | 28 | 0 | 0.0 | 16.1 | 7.1 |
| 1. J15.0 - Pneumonia due to Klebsiella pneumoniae | 27 | 8 | 29.6 | 15.6 | 7.4 |
| 1. H60.2 - Malignant otitis externa | 27 | 0 | 0.0 | 20.3 | 3.7 |
| 1. J39.0 - Retropharyngeal and parapharyngeal abscess | 26 | 0 | 0.0 | 6.0 | 3.8 |
| 1. J86.0 - Pyothorax with fistula | 26 | 0 | 0.0 | 13.9 | 3.8 |
| 1. A46.X - Erysipelas | 25 | 0 | 0.0 | 1.7 | 0.0 |
| 1. L03.8 - Cellulitis of other sites | 25 | 0 | 0.0 | 3.7 | 4.0 |
| 1. L30.3 - Infective dermatitis | 23 | 0 | 0.0 | 3.5 | 13.0 |
| 1. J95.0 - Tracheostomy malfunction | 23 | 1 | 4.3 | 5.1 | 21.7 |
| 1. G06.0 - Intracranial abscess and granuloma | 22 | 1 | 4.5 | 22.6 | 0.0 |
| 1. N30.0 - Acute cystitis | 22 | 0 | 0.0 | 3.0 | 4.5 |
| 1. R57.2 - Septic shock | 21 | 11 | 52.4 | 11.2 | 9.5 |
| 1. A40.9 - Streptococcal sepsis, unspecified | 21 | 3 | 14.3 | 14.9 | 9.5 |
| 1. A16.9 - Respiratory tuberculosis unspecified, without mention of bacteriological or histological confirmation | 20 | 1 | 5.0 | 6.8 | 5.0 |
| 1. G00.9 - Bacterial meningitis, unspecified | 20 | 2 | 10.0 | 12.1 | 0.0 |
| 1. A49.9 - Bacterial infection, unspecified | 19 | 3 | 15.8 | 8.7 | 10.5 |
| 1. A40.0 - Sepsis due to streptococcus, group A | 19 | 4 | 21.1 | 11.6 | 0.0 |
| 1. J15.4 - Pneumonia due to other streptococci | 19 | 4 | 21.1 | 11.1 | 0.0 |
| 1. O23.1 - Infections of bladder in pregnancy | 19 | 0 | 0.0 | 1.7 | 5.3 |
| 1. A41.2 - Sepsis due to unspecified staphylococcus | 19 | 4 | 21.1 | 16.8 | 21.1 |
| 1. N15.1 - Renal and perinephric abscess | 19 | 1 | 5.3 | 11.3 | 5.3 |
| 1. J20.8 - Acute bronchitis due to other specified organisms | 19 | 0 | 0.0 | 3.0 | 0.0 |
| 1. H60.0 - Abscess of external ear | 18 | 0 | 0.0 | 1.3 | 11.1 |
| 1. J15.2 - Pneumonia due to staphylococcus | 18 | 5 | 27.8 | 19.7 | 11.1 |
| 1. A18.0 - Tuberculosis of bones and joints | 18 | 0 | 0.0 | 9.4 | 11.1 |
| 1. M00.2 - Other streptococcal arthritis and polyarthritis | 18 | 0 | 0.0 | 14.2 | 11.1 |
| 1. H70.9 - Mastoiditis, unspecified | 18 | 0 | 0.0 | 3.1 | 5.6 |
| 1. A49.1 - Streptococcal infection, unspecified site | 17 | 1 | 5.9 | 11.5 | 5.9 |
| 1. J69.8 - Pneumonitis due to other solids and liquids | 17 | 5 | 29.4 | 12.2 | 5.9 |
| 1. A40.3 - Sepsis due to Streptococcus pneumoniae | 16 | 2 | 12.5 | 10.7 | 0.0 |
| 1. O86.1 - Other infection of genital tract following delivery | 16 | 0 | 0.0 | 2.2 | 0.0 |
| 1. A16.2 - Tuberculosis of lung, without mention of bacteriological or histological confirmation | 16 | 2 | 12.5 | 8.9 | 0.0 |
| 1. A02.0 - Salmonella enteritis | 15 | 0 | 0.0 | 7.0 | 6.7 |
| 1. G06.1 - Intraspinal abscess and granuloma | 15 | 0 | 0.0 | 48.1 | 13.3 |
| 1. K65.8 - Other peritonitis | 15 | 3 | 20.0 | 8.1 | 6.7 |
| 1. L08.8 - Other specified local infections of skin and subcutaneous tissue | 15 | 0 | 0.0 | 6.4 | 0.0 |
| 1. A48.1 - Legionnaires' disease | 14 | 0 | 0.0 | 12.5 | 0.0 |
| 1. B59.X - Pneumocystosis | 14 | 5 | 35.7 | 15.6 | 21.4 |
| 1. N11.1 - Chronic obstructive pyelonephritis | 14 | 0 | 0.0 | 4.2 | 0.0 |
| 1. K22.3 - Perforation of oesophagus | 14 | 2 | 14.3 | 16.4 | 7.1 |
| 1. G00.1 - Pneumococcal meningitis | 14 | 0 | 0.0 | 12.9 | 7.1 |
| 1. M00.8 - Arthritis and polyarthritis due to other specified bacterial agents | 14 | 0 | 0.0 | 25.6 | 0.0 |
| 1. J98.5 - Diseases of mediastinum, not elsewhere classified | 14 | 1 | 7.1 | 7.1 | 7.1 |
| 1. K61.1 - Rectal abscess | 13 | 1 | 7.7 | 9.1 | 0.0 |
| 1. M65.0 - Abscess of tendon sheath | 13 | 0 | 0.0 | 4.2 | 0.0 |
| 1. A40.1 - Sepsis due to streptococcus, group B | 12 | 1 | 8.3 | 20.2 | 0.0 |
| 1. O08.0 - Genital tract and pelvic infection following abortion and ectopic and molar pregnancy | 12 | 0 | 0.0 | 1.9 | 16.7 |
| 1. K63.0 - Abscess of intestine | 12 | 0 | 0.0 | 9.3 | 16.7 |
| 1. O23.3 - Infections of other parts of urinary tract in pregnancy | 11 | 0 | 0.0 | 1.9 | 18.2 |
| 1. A01.0 - Typhoid fever | 11 | 0 | 0.0 | 7.9 | 9.1 |
| 1. H60.3 - Other infective otitis externa | 10 | 0 | 0.0 | 2.2 | 30.0 |
| 1. A15.0 - Tuberculosis of lung, confirmed by sputum microscopy with or without culture | 10 | 1 | 10.0 | 5.8 | 0.0 |
| 1. J85.1 - Abscess of lung with pneumonia | 10 | 0 | 0.0 | 16.4 | 10.0 |
| 1. J18.8 - Other pneumonia, organism unspecified | 10 | 0 | 0.0 | 2.5 | 0.0 |
| 1. J15.8 - Other bacterial pneumonia | 9 | 1 | 11.1 | 15.2 | 0.0 |
| 1. A04.9 - Bacterial intestinal infection, unspecified | 9 | 0 | 0.0 | 10.4 | 11.1 |
| 1. K57.4 - Diverticular disease of both small and large intestine with perforation and abscess | 9 | 1 | 11.1 | 20.3 | 0.0 |
| 1. K82.2 - Perforation of gallbladder | 9 | 0 | 0.0 | 22.7 | 11.1 |
| 1. N76.8 - Other specified inflammation of vagina and vulva | 9 | 0 | 0.0 | 0.3 | 0.0 |
| 1. M46.2 - Osteomyelitis of vertebra | 9 | 0 | 0.0 | 29.7 | 0.0 |
| 1. J85.2 - Abscess of lung without pneumonia | 9 | 1 | 11.1 | 8.3 | 22.2 |
| 1. J39.1 - Other abscess of pharynx | 8 | 0 | 0.0 | 4.6 | 0.0 |
| 1. A18.2 - Tuberculous peripheral lymphadenopathy | 8 | 0 | 0.0 | 0.1 | 12.5 |
| 1. N76.0 - Acute vaginitis | 8 | 0 | 0.0 | 2.4 | 0.0 |
| 1. L02.8 - Cutaneous abscess, furuncle and carbuncle of other sites | 8 | 0 | 0.0 | 3.1 | 0.0 |
| 1. A41.4 - Sepsis due to anaerobes | 8 | 0 | 0.0 | 12.9 | 12.5 |
| 1. L02.9 - Cutaneous abscess, furuncle and carbuncle, unspecified | 8 | 0 | 0.0 | 0.5 | 0.0 |
| 1. A16.5 - Tuberculous pleurisy, without mention of bacteriological or histological confirmation | 8 | 0 | 0.0 | 6.6 | 0.0 |
| 1. A40.2 - Sepsis due to streptococcus, group D | 8 | 0 | 0.0 | 12.1 | 0.0 |
| 1. K57.0 - Diverticular disease of small intestine with perforation and abscess | 8 | 2 | 25.0 | 11.1 | 0.0 |
| 1. J15.5 - Pneumonia due to Escherichia coli | 8 | 2 | 25.0 | 10.4 | 0.0 |
| 1. K61.2 - Anorectal abscess | 8 | 0 | 0.0 | 0.5 | 0.0 |
| 1. N11.0 - Nonobstructive reflux-associated chronic pyelonephritis | 8 | 0 | 0.0 | 3.1 | 0.0 |
| 1. O86.8 - Other specified puerperal infections | 8 | 0 | 0.0 | 1.9 | 0.0 |
| 1. K61.4 - Intrasphincteric abscess | 7 | 0 | 0.0 | 2.0 | 0.0 |
| 1. M01.1 - Tuberculous arthritis | 7 | 0 | 0.0 | 9.6 | 28.6 |
| 1. A69.2 - Lyme disease | 7 | 0 | 0.0 | 29.6 | 14.3 |
| 1. G00.2 - Streptococcal meningitis | 6 | 1 | 16.7 | 12.5 | 0.0 |
| 1. A39.0 - Meningococcal meningitis | 6 | 0 | 0.0 | 9.3 | 0.0 |
| 1. I33.9 - Acute endocarditis, unspecified | 6 | 0 | 0.0 | 22.3 | 0.0 |
| 1. A39.4 - Meningococcaemia, unspecified | 6 | 0 | 0.0 | 8.2 | 16.7 |
| 1. J15.6 - Pneumonia due to other aerobic Gram-negative bacteria | 6 | 0 | 0.0 | 13.0 | 0.0 |
| 1. J01.0 - Acute maxillary sinusitis | 6 | 0 | 0.0 | 2.5 | 0.0 |
| 1. O23.9 - Other and unspecified genitourinary tract infection in pregnancy | 6 | 0 | 0.0 | 0.5 | 0.0 |
| 1. H66.0 - Acute suppurative otitis media | 6 | 0 | 0.0 | 3.5 | 0.0 |
| 1. J15.9 - Bacterial pneumonia, unspecified | 6 | 0 | 0.0 | 3.0 | 16.7 |
| 1. K81.8 - Other cholecystitis | 6 | 0 | 0.0 | 2.7 | 0.0 |
| 1. A04.4 - Other intestinal Escherichia coli infections | 6 | 0 | 0.0 | 8.8 | 0.0 |
| 1. M71.0 - Abscess of bursa | 6 | 0 | 0.0 | 1.8 | 0.0 |
| 1. M86.3 - Chronic multifocal osteomyelitis | 6 | 0 | 0.0 | 0.0 | 0.0 |
| 1. A15.2 - Tuberculosis of lung, confirmed histologically | 6 | 0 | 0.0 | 11.7 | 16.7 |
| 1. N34.0 - Urethral abscess | 6 | 0 | 0.0 | 1.3 | 0.0 |
| 1. L01.0 - Impetigo [any organism] [any site] | 5 | 0 | 0.0 | 2.2 | 20.0 |
| 1. A19.9 - Miliary tuberculosis, unspecified | 5 | 2 | 40.0 | 29.0 | 20.0 |
| 1. H66.4 - Suppurative otitis media, unspecified | 5 | 0 | 0.0 | 1.0 | 0.0 |
| 1. A37.9 - Whooping cough, unspecified | 5 | 0 | 0.0 | 1.8 | 0.0 |
| 1. A18.3 - Tuberculosis of intestines, peritoneum and mesenteric glands | 5 | 0 | 0.0 | 25.6 | 20.0 |
| 1. A15.6 - Tuberculous pleurisy, confirmed bacteriologically and histologically | 5 | 1 | 20.0 | 18.4 | 0.0 |
| 1. A42.8 - Other forms of actinomycosis | 5 | 0 | 0.0 | 6.8 | 0.0 |
| 1. N71.0 - Acute inflammatory disease of uterus | 5 | 0 | 0.0 | 0.6 | 0.0 |
| 1. A03.9 - Shigellosis, unspecified | 4 | 0 | 0.0 | 5.8 | 0.0 |
| 1. A17.0 - Tuberculous meningitis | 4 | 0 | 0.0 | 41.5 | 0.0 |
| 1. G06.2 - Extradural and subdural abscess, unspecified | 4 | 1 | 25.0 | 39.0 | 0.0 |
| 1. A17.8 - Other tuberculosis of nervous system | 4 | 1 | 25.0 | 16.3 | 0.0 |
| 1. H70.0 - Acute mastoiditis | 4 | 0 | 0.0 | 2.0 | 0.0 |
| 1. J02.0 - Streptococcal pharyngitis | 4 | 0 | 0.0 | 2.3 | 25.0 |
| 1. A56.1 - Chlamydial infection of pelviperitoneum and other genitourinary organs | 4 | 0 | 0.0 | 2.5 | 0.0 |
| 1. A39.8 - Other meningococcal infections | 4 | 0 | 0.0 | 31.0 | 0.0 |
| 1. J03.0 - Streptococcal tonsillitis | 3 | 0 | 0.0 | 1.7 | 0.0 |
| 1. A18.4 - Tuberculosis of skin and subcutaneous tissue | 3 | 0 | 0.0 | 4.3 | 0.0 |
| 1. J01.8 - Other acute sinusitis | 3 | 0 | 0.0 | 1.0 | 0.0 |
| 1. G04.2 - Bacterial meningoencephalitis and meningomyelitis, not elsewhere classified | 3 | 1 | 33.3 | 14.3 | 0.0 |
| 1. A19.1 - Acute miliary tuberculosis of multiple sites | 3 | 0 | 0.0 | 12.0 | 0.0 |
| 1. N43.1 - Infected hydrocele | 3 | 0 | 0.0 | 2.7 | 0.0 |
| 1. N15.9 - Renal tubulo-interstitial disease, unspecified | 3 | 0 | 0.0 | 2.3 | 0.0 |
| 1. N73.0 - Acute parametritis and pelvic cellulitis | 3 | 0 | 0.0 | 4.7 | 0.0 |
| 1. A18.1 - Tuberculosis of genitourinary system | 3 | 0 | 0.0 | 0.7 | 33.3 |
| 1. N70.0 - Acute salpingitis and oophoritis | 3 | 0 | 0.0 | 5.0 | 0.0 |
| 1. A01.1 - Paratyphoid fever A | 3 | 0 | 0.0 | 6.7 | 0.0 |
| 1. N11.8 - Other chronic tubulo-interstitial nephritis | 2 | 0 | 0.0 | 9.0 | 0.0 |
| 1. A19.0 - Acute miliary tuberculosis of a single specified site | 2 | 0 | 0.0 | 33.5 | 50.0 |
| 1. A27.0 - Leptospirosis icterohaemorrhagica | 2 | 0 | 0.0 | 0.0 | 50.0 |
| 1. A15.3 - Tuberculosis of lung, confirmed by unspecified means | 2 | 0 | 0.0 | 10.0 | 0.0 |
| 1. M86.0 - Acute haematogenous osteomyelitis | 2 | 0 | 0.0 | 10.0 | 0.0 |
| 1. A48.3 - Toxic shock syndrome | 2 | 0 | 0.0 | 10.5 | 0.0 |
| 1. A27.9 - Leptospirosis, unspecified | 2 | 0 | 0.0 | 4.5 | 0.0 |
| 1. J15.7 - Pneumonia due to Mycoplasma pneumoniae | 2 | 0 | 0.0 | 9.0 | 0.0 |
| 1. A02.9 - Salmonella infection, unspecified | 2 | 0 | 0.0 | 5.0 | 0.0 |
| 1. N73.1 - Chronic parametritis and pelvic cellulitis | 2 | 0 | 0.0 | 3.0 | 0.0 |
| 1. L01.1 - Impetiginization of other dermatoses | 2 | 0 | 0.0 | 2.0 | 0.0 |
| 1. A32.7 - Listerial sepsis | 2 | 0 | 0.0 | 17.0 | 50.0 |
| 1. A02.1 - Salmonella sepsis | 2 | 0 | 0.0 | 10.5 | 50.0 |
| 1. J01.2 - Acute ethmoidal sinusitis | 2 | 0 | 0.0 | 6.0 | 0.0 |
| 1. A32.1 - Listerial meningitis and meningoencephalitis | 2 | 0 | 0.0 | 25.0 | 0.0 |
| 1. J01.1 - Acute frontal sinusitis | 2 | 0 | 0.0 | 1.0 | 0.0 |
| 1. O86.3 - Other genitourinary tract infections following delivery | 2 | 0 | 0.0 | 1.5 | 0.0 |
| 1. A32.9 - Listeriosis, unspecified | 2 | 0 | 0.0 | 20.5 | 0.0 |
| 1. N76.3 - Subacute and chronic vulvitis | 2 | 0 | 0.0 | 0.0 | 0.0 |
| 1. A03.3 - Shigellosis due to Shigella sonnei | 2 | 0 | 0.0 | 4.0 | 0.0 |
| 1. A41.3 - Sepsis due to Haemophilus influenzae | 1 | 0 | 0.0 | 18.0 | 0.0 |
| 1. A42.0 - Pulmonary actinomycosis | 1 | 0 | 0.0 | 21.0 | 0.0 |
| 1. H73.0 - Acute myringitis | 1 | 0 | 0.0 | 0.0 | 0.0 |
| 1. J15.3 - Pneumonia due to streptococcus, group B | 1 | 0 | 0.0 | 84.0 | 0.0 |
| 1. A15.7 - Primary respiratory tuberculosis, confirmed bacteriologically and histologically | 1 | 0 | 0.0 | 0.0 | 100.0 |
| 1. A17.1 - Meningeal tuberculoma | 1 | 0 | 0.0 | 5.0 | 0.0 |
| 1. L08.0 - Pyoderma | 1 | 0 | 0.0 | 3.0 | 0.0 |
| 1. A15.9 - Respiratory tuberculosis unspecified, confirmed bacteriologically and histologically | 1 | 0 | 0.0 | 9.0 | 0.0 |
| 1. N49.9 - Inflammatory disorder of unspecified male genital organ | 1 | 0 | 0.0 | 1.0 | 0.0 |
| 1. J18.2 - Hypostatic pneumonia, unspecified | 1 | 0 | 0.0 | 7.0 | 0.0 |
| 1. M86.5 - Other chronic haematogenous osteomyelitis | 1 | 0 | 0.0 | 13.0 | 0.0 |
| 1. A42.2 - Cervicofacial actinomycosis | 1 | 0 | 0.0 | 0.0 | 0.0 |
| 1. A16.4 - Tuberculosis of larynx, trachea and bronchus, without mention of bacteriological or histological confirmation | 1 | 0 | 0.0 | 21.0 | 100.0 |
| 1. A02.8 - Other specified salmonella infections | 1 | 0 | 0.0 | 13.0 | 0.0 |
| 1. A06.4 - Amoebic liver abscess | 1 | 0 | 0.0 | 7.0 | 0.0 |
| 1. A68.1 - Tick-borne relapsing fever | 1 | 0 | 0.0 | 2.0 | 0.0 |
| 1. G00.8 - Other bacterial meningitis | 1 | 1 | 100.0 | 2.0 | 0.0 |
| 1. A02.2 - Localized salmonella infections | 1 | 0 | 0.0 | 13.0 | 0.0 |
| 1. I00.X - Rheumatic fever without mention of heart involvement | 1 | 0 | 0.0 | 18.0 | 0.0 |
| 1. K83.2 - Perforation of bile duct | 1 | 0 | 0.0 | 13.0 | 0.0 |
| 1. A19.2 - Acute miliary tuberculosis, unspecified | 1 | 0 | 0.0 | 16.0 | 0.0 |
| 1. O91.0 - Infection of nipple associated with childbirth | 1 | 0 | 0.0 | 0.0 | 0.0 |
| 1. G01.X - Meningitis in bacterial diseases classified elsewhere | 1 | 0 | 0.0 | 154.0 | 0.0 |
| 1. A18.8 - Tuberculosis of other specified organs | 1 | 0 | 0.0 | 9.0 | 0.0 |
| 1. A70.X - Chlamydia psittaci infection | 1 | 0 | 0.0 | 2.0 | 0.0 |
| 1. N76.1 - Subacute and chronic vaginitis | 1 | 0 | 0.0 | 0.0 | 0.0 |
| 1. J16.8 - Pneumonia due to other specified infectious organisms | 1 | 0 | 0.0 | 16.0 | 0.0 |
